# Supplementary material for: Comparison of Host Gene Expression Profiles in Spleen Tissues of Genetically Susceptible and Resistant Mice during ECTV Infection
Source: Hindawi journal article supplement (doi:10.1155/2017/6456180), 2017-01-01
Supplement: f1 [file 6456180.f1.pdf]

## Supplementary Materials: Table S1. Genes and primers used in qRT-PCR

validation.

| Gene name | Accession No. | Primer sequence (5' to 3')                         | Product length (bp) |
|-----------|---------------|----------------------------------------------------|---------------------|
| Gapdh     | AI840508      | GGTTGTCTCCTGCGACTTCA<br>TGGTCCAGGGTTTCTTACTCC      | 183                 |
| Xist      | L04961        | CTGCGTGATACGGCTATTCTC<br>CACTCCTTGGCTTTTCTACTTCC   | 196                 |
| Ptprj     | D83204        | TGGCAGAATACGGACGATG<br>TACTGGGTAATGGAGTTGGAGAT     | 194                 |
| Ddx3x     | L25126        | ACTCCCACCAAGTGAACGATT<br>GGGCGAGTATAACGAGTAAGCT    | 192                 |
| Polr3b    | C85372        | TTATGGCAACAAACGACTGGA<br>CTCTCTGTTTAGGAATCACTTGGTC | 122                 |
| Ifi44     | BB329808      | AAACCATCCGAACTATACCCAT<br>CAGATCCAGGCTATCCACGT     | 193                 |
| Sox4      | BG083485      | GGGGAAAAGAAAAGGAAGAAA<br>CCACCACCAACATCAATAACAA    | 187                 |
| Hspa1b    | M12573        | TTCAAAGTAATGTTGGGAGCAG<br>GAACTGGGCAGCTAGACTATATGT | 148                 |
| Map3k5    | NM_008580     | ACCAGCAGCAGTAGCGAGTAT<br>ATCCCTTTCCCGTCCTTTT       | 113                 |
| Aim1      | BM233292      | GAAGTCAAACCTGCCGAATG<br>GATGTCCCCAAACACCTCAAT      | 223                 |
| Ddx3y     | AA210261      | CCGTAAACAATACCCAATCTCC<br>CCAATCTTTCCTCTTCCATCA    | 225                 |
| Mettl11a  | AV309800      | TGACGAGCGAGGTGATTGA<br>GGAAGTCCCTGTCTTGTGTTGG      | 188                 |
| Zbp1      | AK008179      | GAATGACGACAGCCAAAGAAG<br>GACAAATAATCGCAGGGGACT     | 162                 |
| Ifnz      | BF022827      | TTCCGAGGTTTCTTCCGCT<br>CCGTGCGTCTGCTTTGAAT         | 201                 |
| Iigp1     | NM_021792     | TCCACATTAGGTAGAGCAAGGG<br>TCAATGCTAACCCTGAACACG    | 156                 |
| Ifi204    | NM_008329     | TGGAGCAGTGTCTATGGAGTGT<br>CACACACTAACTTTGGTTGCCT   | 206                 |
| Hist2h2be | AV127319      | AACTGAAACCGCTCTGTCCCT<br>TACCAAATCGGCAGCAACG       | 125                 |
| Ddx6      | BF226295      | ATCAGGTCGCTTTGGTCATC<br>GCGTGCTTGTTACGGTTTCT       | 190                 |
| Nlrc5     | AV277444      | AGGAGTTTGCCTACTATGGGG<br>TCGGCTCAGGTCAAGTTTCT      | 216                 |
| Igk-V28   | AY058908      | CCACCATCCAGTGAGCAGTTA                              | 130                 |

---

|        |           |                                                 |     |
|--------|-----------|-------------------------------------------------|-----|
|        |           | TGTTCAGGACGCCATTTTGT                            |     |
| Pydc4  | BB135602  | TCCAGAACTTGCAGCTCGTGT<br>ATCAGGCTGGAGGTAAGTGGAG | 111 |
| Ifi205 | AI481797  | CAGCCCAGAAAAGGAAAGGT<br>CCGAAGATGAGACCTGGGATA   | 141 |
| Pyhin1 | BM241008  | AGATGTTCCATGCCACCGT<br>CATTGGTTCGCCATCATTAC     | 185 |
| Il18   | NM_008360 | GGACACTTTCTTGCTTGCCA<br>CAGCCTCGGGTATTCTGTTATG  | 209 |
| Cxcl13 | AF030636  | GCATACCCAACCCACATCCT<br>AAGTCCATCTCGCAAACCTCT   | 197 |
| Isg20  | BC022751  | ACTGCTCTGTGGAAGATGCC<br>TCTAACCTGGATGAGGATGAA   | 125 |
| Oasl2  | BQ033138  | ACCCTAAAGGTTTCAGTCCCG<br>ATCAGAGTCTCGTAGATTGCCG | 125 |

---
